# Supplementary material for: Environmental Factors Modulating the Stability and Enzymatic Activity of the Petrotoga mobilis Esterase (PmEst)
Source: PubMed Central journal article supplement (PMC4924860; doi:10.1371/journal.pone.0158146), 2016-06-28
Supplement: pone.0158146.s001.pdf [file pone.0158146.s001.pdf]

**S1 Fig. 3-D structural model of PmEst.**

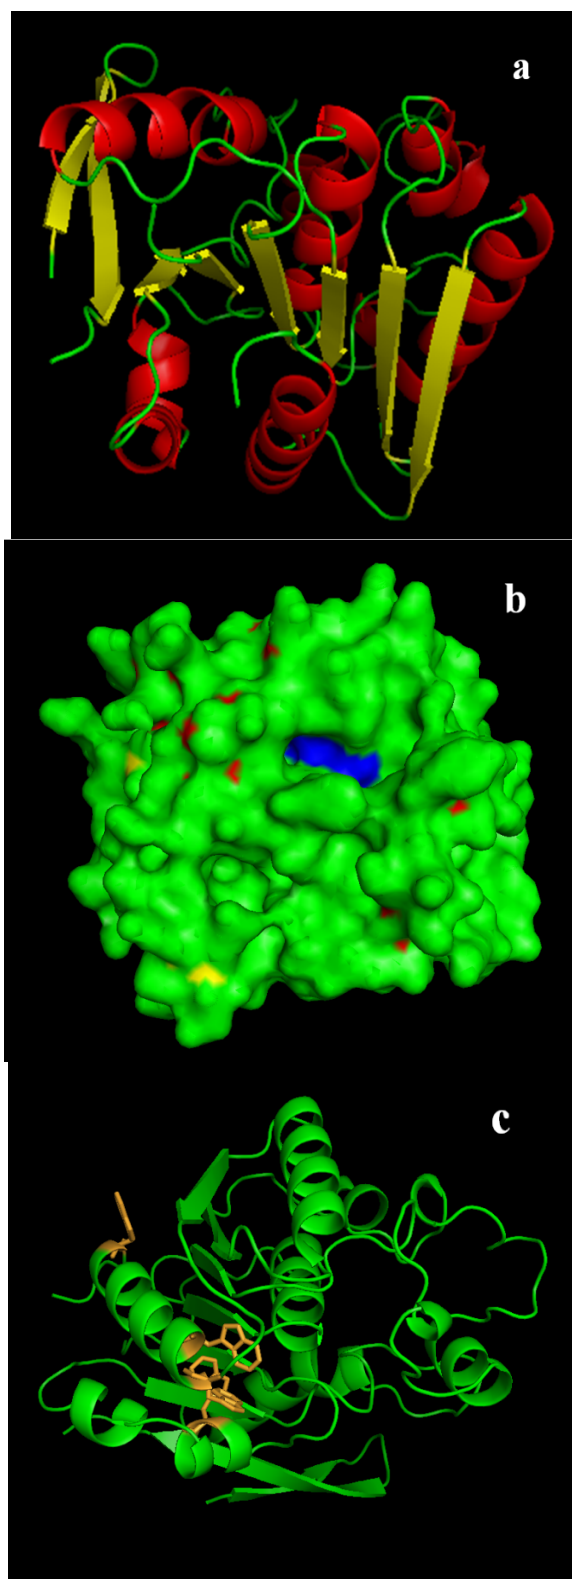

a) Model based on the homology modeling with the crystalline structure of tributyrin esterase (PDB ID: 2UZ0) in cartoon drawing; b) Residues of the esterase domain in PmEst are labeled in blue (on surface view); c) Position of the Trp residues in the 3-D structure of PmEst in cartoon drawing.
